# Supplementary material for: A Functionally Relevant Tool for the Body following Spinal Cord Injury
Source: PubMed Central journal article supplement (PMC3590178; doi:10.1371/journal.pone.0058312), 2013-03-06
Supplement: pone.0058312.s001.pdf [file pone.0058312.s001.pdf]

TABLE 1

## DEMOGRAPHIC AND CLINICAL DATA OF THE PATIENTS

| Case         | Age     | Gender      | Time since Injury (days) | Time since wheelchair utilization | Daily wheelchair use (hours) | Lesion Level | AIS grade | Etiology   | SCIM Self-Care (0-20) | SCIM Mobility (0-40) |
|--------------|---------|-------------|--------------------------|-----------------------------------|------------------------------|--------------|-----------|------------|-----------------------|----------------------|
| P1           | 26      | F           | 3350                     | 3260                              | 10                           | C3           | A         | Traumatic  | 0                     | 3                    |
| P2           | 30      | M           | 2550                     | 2450                              | 10                           | C4           | A         | Traumatic  | 0                     | 3                    |
| P3           | 40      | M           | 730                      | 715                               | 15                           | C4           | D         | Traumatic  | 20                    | 20                   |
| P4           | 24      | M           | 1654                     | 1530                              | 11                           | C4           | B         | Traumatic  | 1                     | 6                    |
| P5           | 30      | M           | 4015                     | 3960                              | 15                           | C5           | A         | Traumatic  | 18                    | 14                   |
| P6           | 35      | M           | 258                      | 195                               | 10                           | C5           | A         | Traumatic  | 4                     | 6                    |
| P7           | 29      | F           | 8395                     | 8310                              | 10                           | C5           | C         | Traumatic  | -                     | -                    |
| P8           | 29      | M           | 540                      | 450                               | 12                           | C5           | A         | Traumatic  | 13                    | 13                   |
| P9           | 40      | M           | 980                      | 920                               | 10                           | C5           | A         | Traumatic  | 4                     | 5                    |
| P10          | 25      | M           | 975                      | 900                               | 15                           | C5           | A         | Traumatic  | 12                    | 11                   |
| P11          | 22      | M           | 420                      | 350                               | 11                           | C5           | A         | Traumatic  | 11                    | 11                   |
| P12          | 31      | M           | 3650                     | 3600                              | 14                           | C6           | A         | Traumatic  | 14                    | 16                   |
| P13          | 40      | M           | 6570                     | 6500                              | 15                           | C6           | A         | Traumatic  | 18                    | 16                   |
| P14          | 54      | F           | 8230                     | 8160                              | 12                           | C6           | A         | Traumatic  | 11                    | 11                   |
| P15          | 29      | M           | 4015                     | 3920                              | 15                           | C6           | C         | Traumatic  | 18                    | 14                   |
| P16          | 31      | M           | 530                      | 495                               | 13                           | C6           | A         | Traumatic  | 11                    | 11                   |
| P17          | 29      | F           | 750                      | 690                               | 10                           | C6           | C         | Traumatic  | 5                     | 6                    |
| P18          | 52      | F           | 3650                     | 3550                              | 10                           | C6           | A         | Traumatic  | 9                     | 10                   |
| P19          | 61      | F           | 9000                     | 8930                              | 14                           | C6           | A         | Traumatic  | 15                    | 14                   |
| P20          | 40      | M           | 400                      | 310                               | 10                           | C6           | A         | Traumatic  | 0                     | 3                    |
| P21          | 41      | M           | 3900                     | 3825                              | 15                           | C6           | A         | Traumatic  | 18                    | 16                   |
| P22          | 36      | F           | 4000                     | 3940                              | 14                           | C6           | A         | Traumatic  | 13                    | 14                   |
| P23          | 22      | F           | 3900                     | 3830                              | 14                           | C6           | A         | Traumatic  | -                     | -                    |
| P24          | 65      | M           | 230                      | 190                               | 10                           | C7           | C         | Traumatic  | 5                     | 6                    |
| P25          | 22      | M           | 290                      | 230                               | 10                           | C7           | D         | Traumatic  | 20                    | 19                   |
| P26          | 47      | M           | 1095                     | 995                               | 10                           | C7           | D         | Neoplastic | 5                     | 6                    |
| P27          | 62      | F           | 300                      | 260                               | 10                           | T2           | A         | Myelitis   | 12                    | 9                    |
| P28          | 34      | M           | 240                      | 215                               | 13                           | T3           | A         | Traumatic  | 17                    | 15                   |
| P29          | 42      | M           | 1170                     | 1140                              | 11                           | T3           | A         | Traumatic  | 18                    | 15                   |
| P30          | 47      | M           | 2400                     | 2330                              | 11                           | T4           | A         | Traumatic  | 19                    | 16                   |
| P31          | 56      | M           | 2100                     | 2020                              | 13                           | T4           | A         | Traumatic  | 19                    | 16                   |
| P32          | 53      | M           | 10220                    | 10160                             | 14                           | T4           | A         | Traumatic  | 14                    | 9                    |
| P33          | 72      | F           | 188                      | 160                               | 11                           | T5           | C         | Traumatic  | 12                    | 9                    |
| P34          | 44      | M           | 6040                     | 5985                              | 15                           | T5           | A         | Traumatic  | 20                    | 19                   |
| P35          | 63      | M           | 4000                     | 3880                              | 10                           | T5           | A         | Neoplastic | 20                    | 15                   |
| P36          | 39      | F           | 3850                     | 3710                              | 14                           | T5           | A         | Traumatic  | 20                    | 19                   |
| P37          | 35      | M           | 6770                     | 6700                              | 16                           | T7           | A         | Traumatic  | 20                    | 19                   |
| P38          | 31      | M           | 450                      | 380                               | 12                           | T7           | A         | Traumatic  | 20                    | 17                   |
| P39          | 42      | M           | 4945                     | 4885                              | 16                           | T8           | A         | Traumatic  | 20                    | 19                   |
| P40          | 39      | M           | 5840                     | 5760                              | 15                           | T8           | A         | Traumatic  | 19                    | 16                   |
| P41          | 42      | M           | 1170                     | 1070                              | 14                           | T9           | A         | Neoplastic | 20                    | 18                   |
| P42          | 42      | M           | 4380                     | 4320                              | 15                           | T9           | A         | Traumatic  | 20                    | 19                   |
| P43          | 19      | M           | 789                      | 750                               | 14                           | T10          | A         | Traumatic  | 20                    | 19                   |
| P44          | 42      | M           | 960                      | 925                               | 15                           | T10          | A         | Traumatic  | 20                    | 19                   |
| P45          | 35      | M           | 590                      | 520                               | 11                           | T10          | A         | Traumatic  | 20                    | 19                   |
| P46          | 27      | M           | 1200                     | 1170                              | 14                           | T10          | A         | Traumatic  | 20                    | 16                   |
| P47          | 40      | M           | 4015                     | 3865                              | 15                           | T11          | A         | Traumatic  | 20                    | 19                   |
| P48          | 47      | M           | 2190                     | 2140                              | 15                           | T11          | A         | Traumatic  | 20                    | 15                   |
| P49          | 39      | M           | 3256                     | 3195                              | 14                           | T11          | A         | Traumatic  | 20                    | 19                   |
| P50          | 49      | F           | 450                      | 410                               | 11                           | T12          | A         | Traumatic  | 18                    | 15                   |
| P51          | 38      | M           | 2057                     | 2000                              | 15                           | T12          | A         | Traumatic  | 20                    | 19                   |
| P52          | 29      | M           | 2190                     | 2160                              | 16                           | L1           | A         | Traumatic  | 20                    | 21                   |
| P53          | 56      | M           | 600                      | 540                               | 10                           | L1           | C         | Traumatic  | 17                    | 13                   |
| P54          | 34      | M           | 1100                     | 1055                              | 12                           | L1           | D         | Neoplastic | 20                    | 21                   |
| P55          | 68      | M           | 4745                     | 4685                              | 10                           | L1           | A         | Traumatic  | 17                    | 17                   |
| <i>Range</i> | 19 - 72 | 12 F - 43 M | 188 - 10220              | 160 - 10160                       | 10 - 16                      | C3 - L1      | A - D     | -          | 0 - 20                | 3 - 21               |
| <i>Mean</i>  | 39.92   |             | 2768.76                  | 2701.72                           | 12.67                        |              |           |            | 14.84                 | 13.88                |
| <i>SD</i>    | 12.65   |             | 2540.82                  | 2533.73                           | 2.15                         |              |           |            | 6.42                  | 5.17                 |

Supporting Table 1. Clinical and demographic characteristics of patients with SCI.

The neurological levels of the lesion and injury, as determined by the American Impairment Scale (AIS), are indicated. Spinal Cord Independence Measure (SCIM) scores were not available for patient nos. 12 and 25.

| Statement    | Scores |                    | Communalities |              |              |
|--------------|--------|--------------------|---------------|--------------|--------------|
|              | Mean   | Standard deviation | 1° component  | 2° component | 3° component |
| Diet         | 3.18   | 2.15               | 0.05          | 0.54         | 0.57         |
| Maintenance  | 4.45   | 2                  | 0.001         | 0.66         | 0.67         |
| Defense      | 4.03   | 2.37               | 0.002         | 0.61         | 0.66         |
| Tool         | 3.2    | 2.38               | 0.32          | 0.36         | 0.66         |
| Affect       | 2.9    | 2                  | 0.27          | 0.37         | 0.63         |
| Entire body  | 2.6    | 2.34               | 0.02          | 0.03         | 0.82         |
| Lower limbs  | 3.38   | 2.58               | 0.58          | 0.66         | 0.68         |
| Substitution | 3.74   | 2.77               | 0.53          | 0.53         | 0.54         |
| Action       | 5.12   | 2.24               | 0.53          | 0.68         | 0.68         |

Supporting Table 2: Scores and communalities on questionnaire statements.

Mean, standard deviations, and communalities for the three components in each of the statements.
